# Supplementary material for: Network-based bioinformatics analysis of spatio-temporal RNA-Seq data reveals transcriptional programs underpinning normal and aberrant retinal development
Source: PubMed Central journal article supplement (PMC5009874; doi:10.1186/s12864-016-2822-z), 2016-08-31
Supplement: 12864_2016_2822_MOESM1_ESM.pdf [file 12864_2016_2822_MOESM1_ESM.pdf]

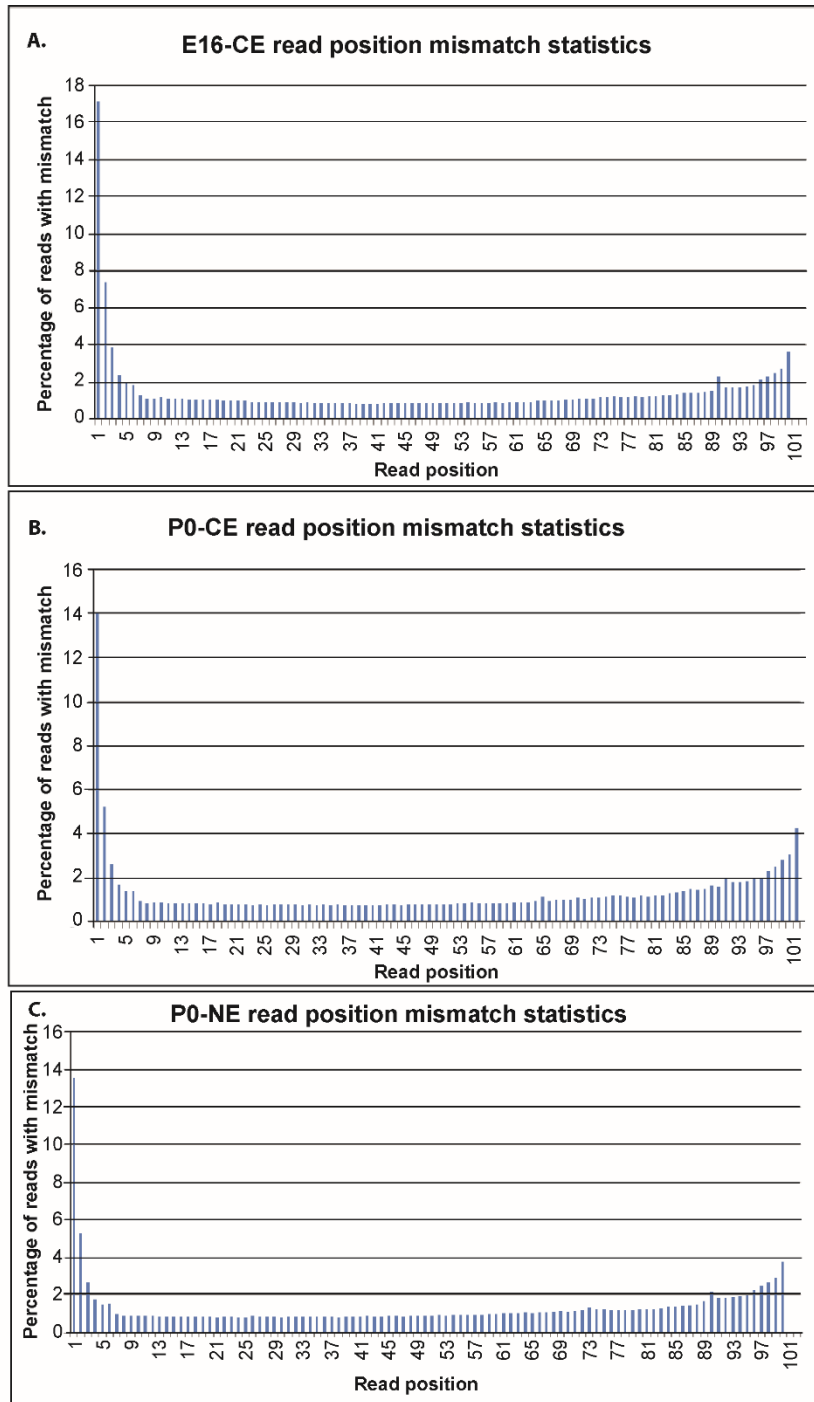

**Figure S1 (Related to Materials and Methods): Read position mismatch analysis. A – C.** Reads obtained from deep RNA sequencing for E16CE (A), P0CE (B) and P0NE (C) were subjected to mismatch analysis by HardMerge alignment. Shown in x-axis is the read position (1 – 101) and shown in y-axis is the percentage of reads with mismatch.

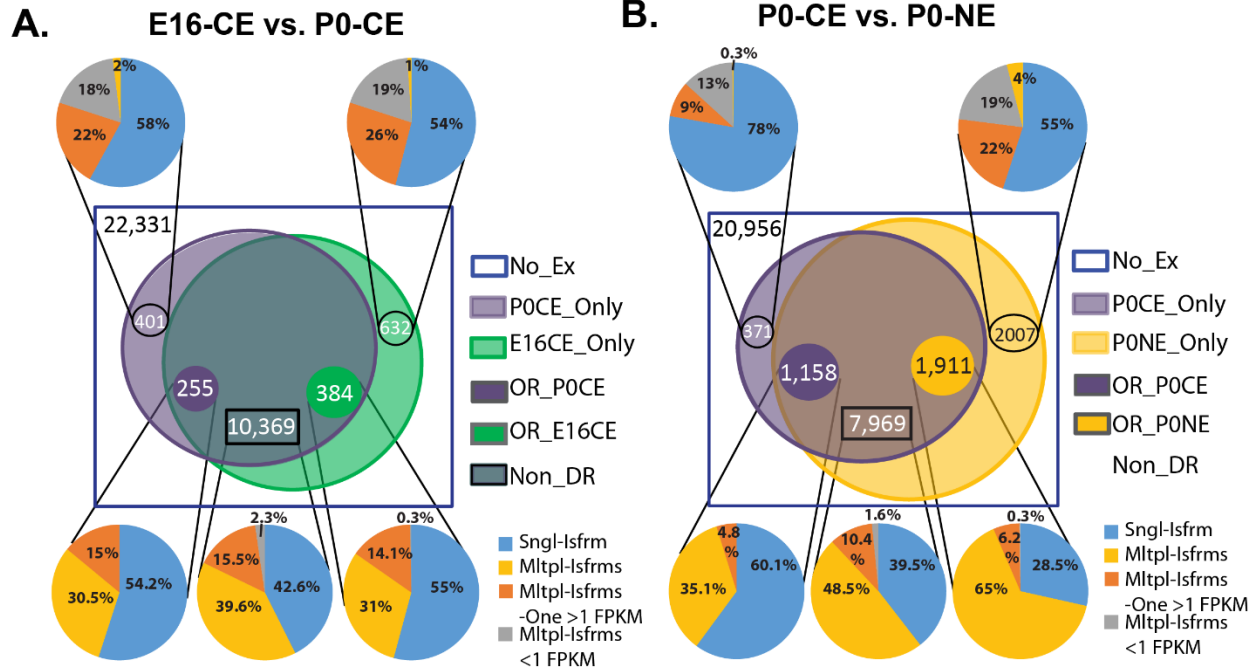

**Figure S2 (Related to Fig. 2): Transcriptome summary for E16CE-P0CE & P0CE-P0NE comparison: A & B.** Transcriptome summary of the comparison between E16CE-P0CE and P0CE-P0NE, respectively. The white box represents all genes examined for this study. The venn diagram within it represents the different bins. **C.** Alternative splicing (AS) status of “expressed in both” groups (OR\_E16CE, Non\_DR, OR\_P0CE, and OR\_P0NE) in E16CE-P0CE and P0CE-P0NE comparisons.

**A.**

|              |            | POCE - PONE                                                                                                                                                               |              |                                                                                                                                                                                                                                                                                                    |                                                          |
|--------------|------------|---------------------------------------------------------------------------------------------------------------------------------------------------------------------------|--------------|----------------------------------------------------------------------------------------------------------------------------------------------------------------------------------------------------------------------------------------------------------------------------------------------------|----------------------------------------------------------|
|              |            | Non_DR                                                                                                                                                                    | OR_POCE      | OR_PONE                                                                                                                                                                                                                                                                                            | PONE_Only                                                |
| E16CE - POCE | E16CE_Only | -                                                                                                                                                                         | -            | -                                                                                                                                                                                                                                                                                                  | <i>Dtna, Drp2</i>                                        |
|              | Non_DR     | <i>Cyfp2, Gria1, Cadps, Rims2, Dlg4, Dlgap3, Nde1, Atp2b2, Cplx1, Dlgap4, Nit1, Sdcbp, Ndel1, Dlgap5, Dlg1, Grip1, Unc13a, Sipa111, Dlg3, Cask, Fam49a, Fam49b, Snta1</i> | -            | <i>Cadps2, Dmxl2, Ank3, F2r, Camk2d, Cplx2, Cyfp1, Dtnb, Dmd, Gria2, Gria4, Grik2, Grm7, Grm8, Gad2, Itpr1, Lrrk2, Magi2, Mpdz, Myo6, Myo7a, Myh10, Myh9, Nrnx1, Nrnx3, Nbea, Nlgn1, Ophn1, Plcb4, Psd3, Dennd1a, Rab3c, Slc1a2, Sos1, Sypl, Syt1, Tanc1, Unc13b, Unc13c, Utrn, Kif1b, Zdhhc17</i> | -                                                        |
|              | OR_E16CE   | <i>Syt13</i>                                                                                                                                                              | -            | <i>Agrr, Snbt2</i>                                                                                                                                                                                                                                                                                 | -                                                        |
|              | OR_POCE    | -                                                                                                                                                                         | <i>Cplx3</i> | <i>Dlg2</i>                                                                                                                                                                                                                                                                                        | -                                                        |
|              | POCE_Only  | <i>Grin1, Grm3</i>                                                                                                                                                        | -            | <i>Dlgap1, Gria3, Gad1, Kcnma1</i>                                                                                                                                                                                                                                                                 | -                                                        |
|              | No_Ex      | -                                                                                                                                                                         | -            | -                                                                                                                                                                                                                                                                                                  | <i>Grid2, Ryr2, Shank2, Grik5, Grin2b, Grid1, Grin3a</i> |

**B. Presynaptic terminal**

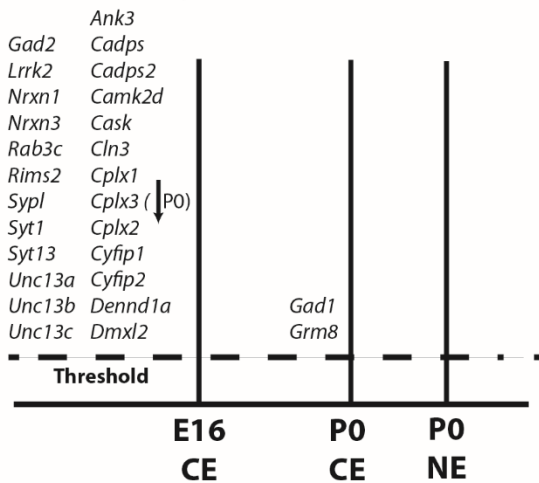

**Postsynaptic terminal**

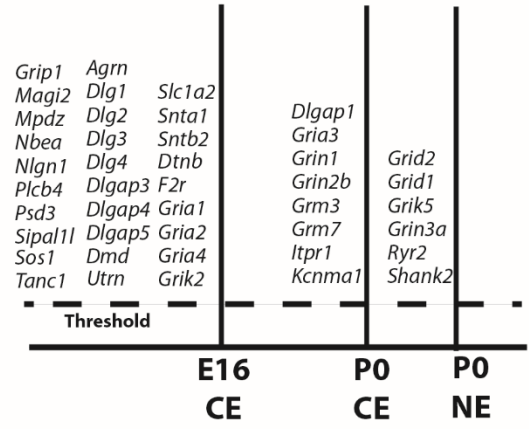

**Figure S3 (Related to Fig. 4): Downstream analysis of genes belonging to the OR\_POONE bin enriching for the GOterm "Synapse": A.** Output of the downstream gene annotation analysis pipeline parts II and III for OR\_POONE category which enriched for synapse. **B.** Genes resulted

from the DAVID analysis for the GOterm “synapse” were further sub-divided into presynaptic or postsynaptic along with the time point of their transcription initiation. Up (↑) and down (↓) arrows indicate upregulation or downregulation of transcription at that time point.

**A. Static analysis P21-*Nrl*-WT vs. P21-*Nrl*-KO**

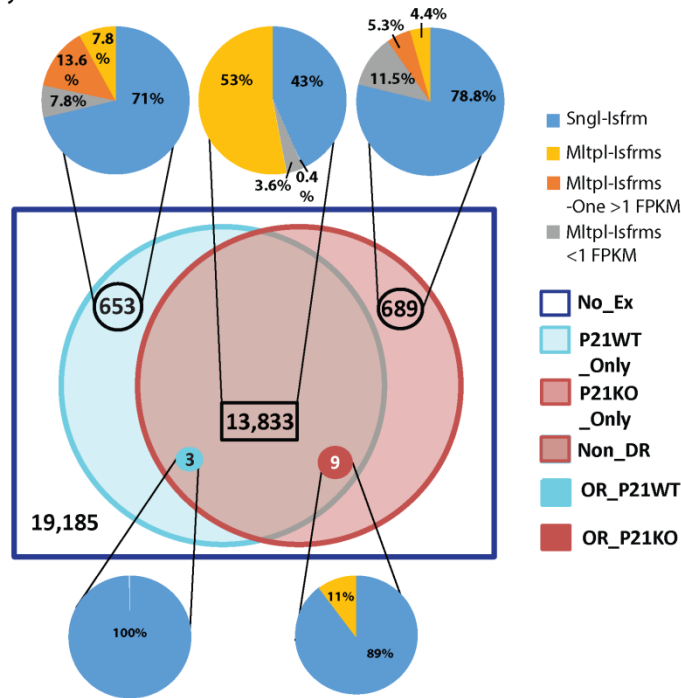

**B. Temporal analysis P0 vs. P21-*Nrl*-WT**

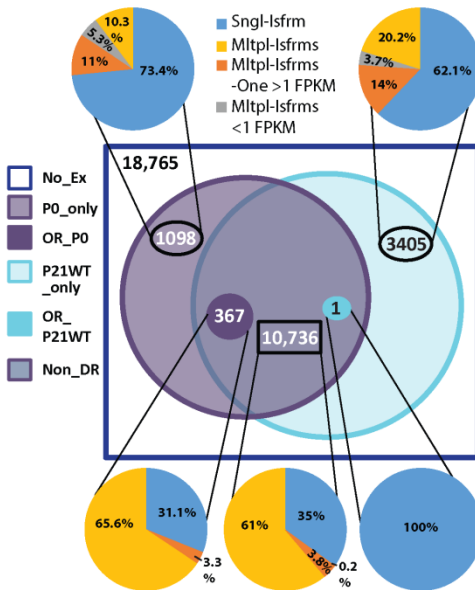

**C. Temporal analysis P0 vs. P21-*Nrl*-KO**

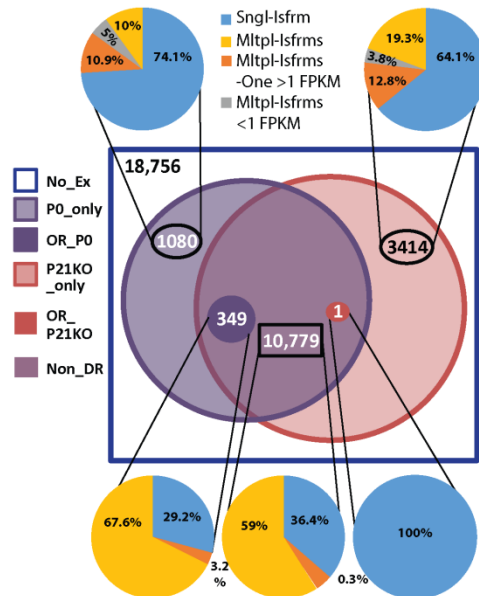

**Figure S4 (Related to Fig. 5): Transcriptome summary for static & temporal comparison:**

**A.** Transcriptome summary of the comparison between P21-*Nrl*-WT and P21-*Nrl*-KO (Static comparison). The white box represents all genes examined for this study. The venn diagram within it represents the different bins. **B & C.** Transcriptome summary of the comparison

between P0 vs. P21-*Nrl*-WT and P0 vs. P21-*Nrl*-KO, respectively (Temporal comparison). The white box represents all genes examined for this study. The venn diagram within it represents the different bins.
